# Supplementary material for: A comprehensive review and call for studies on firefly larvae
Source: PeerJ. 2021 Sep 20;9:e12121. doi: 10.7717/peerj.12121 (PMC8459732; doi:10.7717/peerj.12121)
Supplement: Supplemental Information 2 [file peerj-09-12121-s002.xlsx]

## Sheet: Supp_mat
Supplemental information 2. Reference list indicating the species included and the source (i.e. primary or secondary).
	Species	Souce
Alvarez & De Cock 1900	Nyctophila reichii (Jaquelin Du Val)	primary
Amaral, Silva & Viviani 2017	Aspisoma lineatum (Gyllenhaal)	primary
Annadale 1900	indet	primary
Annandale 1904	indet	primary
Annandale 1906	Luciola sp.	primary
Archangelsky & Branham 1998	Pyractomena borealis (Randall)	primary
Archangelsky & Branham 2001	Pyropyga nigricans (Say)	primary
Archangelsky 2004	Aspisoma fenestrata Blanchard	primary
Archangelsky 2010	Pyractomena nigripennis Solier	primary
Armitage 1908	Australoluciola flavicollis (MacLeay)	primary
Arvy & Gabe 1949	Pelania mauritanica (Linnaeus)	Apud Peterson 1970
Ballantyne & Buck 1979	Atyphella aphrogeneia (Ballantyne & Buck ), Astraloluciola australis (Fabricius)	primary
Ballantyne & Lambkin 2000	Atyphella atra Lea, At. olivieri Lea, At. scintillans Olliff, At. flammans Olliff, At. lychnus Olliff, At. similis Ballantyne & Lambkin, At. scintillans Ollif, Australoluciola australis F., Au. nigra Olivier, Lloydiella majuscula (Lea), Au. orapallida Ballantyne & Lambkin, Australoluciola flavicollis (MacLeay).	primary
Ballantyne & Lambkin 2006	Pygoluciola	primary
Ballantyne & Lambkin 2009	Atyphela spp, Colophotia praeusta Eschscholtz, Lloydiella majuscula (Lea), Magnalata limbata (Blanchard)	primary
Ballantyne & Lambkin 2013	Luciolinae	primary
Ballantyne & McLean 1970	Atyphella, Pterotyx malaccae (Gorham)	primary
Ballantyne & Menayah 2002	Pterotyx valida Olivier	primary
Ballantyne 1968	Luciola hypocrita E.Olivier	primary
Ballantyne 1987	Luciola, Atyphella	primary
Ballantyne 1988	Luciola australis	primary
Ballantyne 2001	Luciola guerini Laporte	Abstract at Zoological Record
Ballantyne et al. 2011	Pterotyx maipo Ballantyne	primary
Ballantyne et al. 2013	Abscondita anceyi (Olivier), A. chinensis (L.), A. terminalis (Olivier).	primary
Ballantyne et al. 2016	Sclerotia fui Ballantyne	primary
Ballantyne et al. 2019	Luciolinae	primary
Barber 1923	?Phaenolis abdita E. Olivier	primary
Bertrand 1973	Pyrophanes?	primary
Bess 1956	Lamprigera tenebrosa (Walker)	primary
Bessho-Uehara & Oba 2017	Luciola parvula Kiesen	primary
Bessho-Uehara, Konishi & Oba 2017	Pyrocoelia atripennis Lewis	primary
Beutel 1995	Phosphaenus	primary
Bibi & Ittichan 2005	Lamprigera sp.	primary
Blair 1927	indet	primary
Blair 1928	Lamprigera cf boyei Motschulsky	Apud Brues 1941
Bongardt 1903	Phosphaenus hemipterus (Goeze), Lampyris noctiluca L, Lamprohiza splendidula (L.)	primary
Bongardt 1904	Lampyris noctiluca	primary
Bourgeois 1884	Luciola lusitanica (Charpentier, 1825)	Apud Bugnion 1922.
Boving & Craighead 1931	Lampyris noctiluca, Photinus pyralis (L.), P. pensylvannica Geer	primary
Branham & Archangelsky 2000	Lucidota atra (G. Olivier)	primary
Brues 1941	Lamprigera sp	primary
Buck & Buck 1970	Atyphella aphrogeneia	Apud Ballantyne & Buck, 1979; Jeng, Lai & Yang 2003
Buck & Case 1961	Photuris	primary
Buck 1948	Photinus pyralis, Photuris pensylvannica	primary
Buck, Case & Hanson 1963	Photuris	primary
Bugnion 1919	Lamprohiza delarouzei Jaquelin Du Val	primary
Bugnion 1921	Luciola lusitanica	Apud Bugnion 1922
Bugnion 1922a	Luciola lusitanica	primary
Bugnion 1922b	Lamprohiza delarouzei, Pelania mauritanica, Lampyris noctiluca	primary
Bugnion 1929	Lamprohiza delarouzei	Apud Novak 2018
Bugnion 1933	Pelania mauritanica	Listed at Zoological records
Bugnion 1934	Pelania mauritanica	primary
Buschman & Faust 2014	Photinus carolinus Green	primary
Buschman 1984a	Pyractomena lucifera Melsheimer	primary
Buschman 1984b	Photuris congener LeConte, Photuris spp.	primary
Buschman 1988a	Pyractomena lucifera	primary
Buschman 1988b	lampyrid in general (incl. Photuris, Pyractomena, Lamprohiza)	primary
Buschman 2019	Pyractomena lucifera, Py. limbicollis Green, Photinus ardens LeConte, Ph. carolinus Green, Photuris spp.	primary
Campos, Silveira & Mermudes 2018	Cratomorphus cossyphinus (Perty)	primary
Candèze, 1861	Aspisoma candelaria Reiche, Photuris trilineata (Say)	primary
Carlson & Evans 1986	Photuris sp	primary
Carlson & Jalenak 1986	Photuris versicolor (F.)	primary
Carlson 1965	Photurinae	primary
Carlson 1968a	Photuris	primary
Carlson 1968b	Photuris	primary
Carlson 1972	Photuris	primary
Carvalho et al. 2020	Aspisoma lineatum	primary
Chanchay et al. 2019	Sclerotia aquatilis (Thancharoen)	primary
Chen & Chen 1997	Aquatica ficta (Olivier)	Apud Ho et al. 2010
Chen et al. 2012	Aquatica ficta	primary
Chen et al. 2018	Aquatica ficta	primary
Chen et al. 2021	Aquatica ficta	primary
Christensen & Carlson 1981	Photuris sp	primary
Christensen & Carlson 1982	Photuris versicolor	primary
Christensen et al. 1983	Photuris versicolor	primary
Cicero 1982	Bicellonycha wickershamorum Cicero	primary
Cicero 1994	Photuris sp, Pyractomena sp, Photinus collustrans Leconte	primary
Copeland 1981	Photuris lucicrescens Barber, Photuris versicolor, Photuris sp.	primary
Costa, Vanin & Casari-Chen 1988	Lucio castelnaui Kirsch, Cratomorphus sp., Aspisoma sp., Bicellonycha sp.,	primary
Cros 1924	Pelania mauritanica L.	primary
Davydova 1968	Lampyris orientalis Faldermann	Listed ar Zoological Record
Day 2011	Pyractomena borealis, Lampyris noctiluca, Lampyris sardiniae Geisthardt	primary
De Cock & Geisthardt 2007	Lampyris sardiniae	primary
De Cock & Matthysen 1999	Lampyris noctiluca	primary
De Cock & Matthysen 2001	Lampyris noctiluca	primary
De Cock & Matthysen 2003	Lampyris noctilula	primary
De Cock 2000	Phosphaenus hemipterus	primary
De Cock 2004	Lampyris noctiluca, Phosphaenus hemipterus, Lamprohiza splendidula	primary
De Cock et al. 2015	Luciola lusitanica, Lamprohiza mulsanti Kiesenwetter, Lamprohiza paulinoi E.Olivier, Lampyris noctiluca, Lampyris raymondi Mulsant & Rey, Lampyris iberica Geisthardt, Nyctophila reichii, Phosphaenus hemipterus, Phosphaenopterus metzneri Schaufuss	primary
De Cock, Faust & Lewis 2014	Phausis reticulata (Say)	primary
De Maria, Pellegrino & Okabe 1967	Luciola cruciata (E.Olivier)	primary
Dean 1979	Pterotus obscuripennis LeConte	Apud Buschman 2019
Deheyn & Ballantyne 2009	Luciola hypocrita	primary
Domagala & Ghiradella 1984	Photuris sp	primary
Dreisig 1974	Lampyris noctiluca	primary
Fabre 1913	Lampyris nocticula	primary
Fabre 1924	Lampyris noctiluca	primary
Fairmaire 1900	Luciola cavifrons F.	primary
Fallon et al 2018	Aquatica lateralis (Motschulsky), Photinus pyralis	primary
Fang et al. 2013	Pyrocoelia pectoralis	primary
Faust 2012	Pyractomena borealis, Ellychnia corrusca (L.)	primary
Faust & Faust 2014	Photuris quadrifulgens, Lucidota atra	primary
Faust & Forrest 2017	Phausis inaccensa LeConte	primary
Faust 2010	Photinus carolinus	primary
Faust 2017	Lamprohizinae, Lampyrinae, Photurinae	primary
Fletcher 1919	Abscondita chinensis (L.)	Apud Ballantyne et al. 2019
Forsyth, Peterle & Bandy 1983	Photuris sp	primary
Fu & Ballantyne 2006	Aquatica leii (Fu & Ballantyne)	primary
Fu & Ballantyne 2008	Pygoluciola qingyu Fu & Ballantyne	primary
Fu & Ballantyne 2009	Sclerotia substriata (Gorham), Aquatica leii (Fu et Ballantyne), L. cruciata, Aquatica ficta Olivier, A. lateralis	primary
Fu & Meyer-Rochow 2012	Aquatica leii	primary
Fu & Meyer-Rochow 2013	Pyrocoelia pectoralis	primary
Fu & Meyer-Rochow 2021	Aqualica leii	primary
Fu 2009	Pyrocoelia pectoralis	primary
Fu et al. 2005a	Sclerotia substriata	primary
Fu et al. 2005b	Sclerotia substriata	primary
Fu et al. 2006a	Aquatica leii	primary
Fu et al. 2006b	Aquatica leii	primary
Fu et al. 2007	Aquatica leii	primary
Fu et al. 2009	Aquatica leii, Aquatica lateralis, Luciola cruciata, Diaphanes spp., Lampyris noctiluca, Pyrocoelia analis, P. pectoralis	primary
Fu, Ballantyne & Lambkin 2010	Aquatica wuhana Fu, Ballantyne & Lambkin	primary
Fu, Ballantyne & Lambkin 2012a	Emeia pseudosauteri (Geisthardt), Curtos costipennis (Gorham), Luciola hypocrita	primary
Fu, Ballantyne & Lambkin 2012b	Asymmetricata circumdata (Motsch.), Aquatica ficta (Olivier), A. hydrophila (Jeng et al.), A. lateralis, A. leii, A. wuhana, Luciola cruciata, L. owadai Satô et Kimura, L. aquatilis Thancharoen, Pteroptyx valida E.Olivier, Pygoluciola qingyu, Sclerotia substriata	primary
Fu, Ohba & Lei 2004	Luciola substriata	Abstract at Zoological Record and http://www.insect.org.cn/EN/abstract/abstract3684.shtml
Fu, Seelan & Dawood 2017	Pteroptyx bearni E.Olivier	primary
Fu, Wang & Lei 2005	Luciola substriata, Aquilonia costata, Luciola burgeoisea, Luciola hypocrita	Abstract at Zoological Records and http://en.cnki.com.cn/Article_en/CJFDTOTAL-KCZS200504014.htm
Ganguly & Gosh 1982	Abscondita chinensis	listed at FIN
Gardner 1946	Abscondita chinensis, A. perplexa (Walker)	Apud Fu, Ballantyne & Lambkin 2012
Geisthardt 2007	Lampyris vesuvius vesuvius Geisthardt	Abstract at Zoological Record
Geisthardt 1979	Lamprohiza splendilula, Lampyris noctiluca	Apud Novak 2018
Gentry 2003	Pyractomena borealis	primary
Ghigi 1901	Luciola italica (L.)	primary
Gorgadze & Tskhadaia 1995	Lampyris noctiluca	primary
Gorgadze 1998	Lampyris noctiluca	primary
Gotou et al. 2005	Luciolinae	primary
Gunn & Gunn 2013	Lampyris noctiluca	primary
Haddon 1915	Lampyris noctiluca	primary
Hadj-Mohammadi & Chaichi 1996	Lampyris turkestanicus Heyden	primary
Hanneda 1977	Luciola cruciata, Aquatica lateralis	Apud Ballantyne & Buck, 1979
Hara 1962	Luciola cruciata, L. lateralis	primary
Harvey & Hall 1929	unspecified	primary
Hasama 1942a	Aquatica lateralis	primary
Hasama 1942b	Luciola cruciata, Pyrocoelia rufa E.Olivier	primary
Hashmi, Asghar & Hamed 1986	Photinus sp.	Abstract at Zoological Record
Hastings & Buck 1956	Photuris sp	primary
Hatano & Kato 1963	Luciola lateralis	Listed at Zoological Records
Hayashi 1991	Drilaster sp	Apud Janisova & Bocakova 2013
Hess 1920	Photinus consanguineus LeConte, Photinus scintillans Say, Photuris pennsylvanica, Pyropyga fenestralis (Mels.)	primary
Hess 1922	Photuris pennsylvanica	primary
Ho & Chiang 1997	Aquatica ficta	Apud Ho et al 2010
Ho & Chiang 2002.	Luciola spp	Apud Ho et al. 2010
Ho & Huang 2003	Pyrocoelia analis	primary
Ho & Jong 1997	Pristolycus kanoi Nakane	Abstract read online
Ho & Su 2000	Abscondita chinensis, A. dubia	Apud Fu, Ballantyne & Lambkin 2012
Ho 2002	Aquatica ficta, Abscondita anceyi (Olivier), Ab. cerata Olivier, Ab. chinensis, Curtos sauteri (Olivier), Diaphanes citrinus (Olivier), D. formosus Olivier, D. lampyroides (Olivier), Lamprigera yunnana (Fairmaire), Lucidina biplagiata (Motschulsky), Luciola spp., Pristolycus kanoi Nakane, Pyrocoelia analis, Py. formosana Olivier, Py. praetexta Olivier, Py. sanguiniventer (Olivier), Pyrocoelia sp.…	primary
Ho 2004	Pyrocoelia analis	primary
Ho et al. 2010	Aquatica ficta	primary
Ho et al. 2014	Abscondita cerata	primary
Ho, Chiang & Yang 2006	Aquatica ficta	primary
Ho, Chu & Chu 1998	Sclerotia substriata	Apud Ho et al. 2010
Ho, Fang & Yang 2014	Luciola cerata	primary
Ho, Su & Huang 2003	Pyrocoelia analis	Apud Ho et a. 2010
Horne & Horne 2017	Lampyris noctiluca	primary
Hutson & Austin 1924	Lamprigera tenebrosa	primary
Imms 1933	Luciola sp.	primary
Imuta, Nakamura & Hirata 1994	Luciola picticollis	primary
Ineichen 2004	Luciola sp.	primary
Jakla, Thancharoen & Pinkaew 2020	Pterotyx valida	primary
Janisova & Bocakova 2013	Drilaster, Stenocladius	primary
Jeng et al. 1998	Curtos	Apud Fu, Ballantyne & BAmbkin 2012
Jeng et al. 2021	Lamprigera minor E.Olivier	primary
Jeng, Lai & Yang 2003	Luciola cruciata, L. owadai, Aquatica ficta, A. lateralis, Sclerotia substriata	primary
Kakehashi, Kuranishi & Kamata 2013	Luciola parvula Kiesenwetter	primary
Kakehashi, Kuranishi & Kamata 2014	Luciola parvula	primary
Kanda 1934	Luciola cruciata	Apud Kim et al 2008
Kanjana et al. 2017	Cyphonocerus okinawanus Nakane	primary
Katsuno 1963	Luciola cruciata	Apud McLean et al. 1972
Katsuno 1968	Luciolinae	Apud Oh et al 2009a
Kaufmann 1965	Luciola discicollis Laporte	primary
Kawashima & Satou 2004	Stenocladius	Apud Janisova & Bocakova 2013
Kawashima & Takai 2004	Lucidina okadai Nakane & Ohbayashi	primary
Kawashima 2017a	Lucidina accensa Gorham	abstract at Zoological Record
Kawashima 2017b	Cyphonocerus okinawanus Nakane	listed at FIN
Kawashima 2018	Curtos costipennis, C. okinawanus Matsumura	Abstract at Zoological Record
Kawashima 2019a	Luciola filiformis Olivier	abstract at Zoological Record
Kawashima 2019b	Lucidina natsumiae Chujo & Sato	Abstract at Zoological Record
Kawashima 2020a	Pristolycus sagulatus	primary
Kawashima 2020b	Luciola tsushimana Nakane	Abstract at Zoological Record
Kawashima et al. 2016	Pristolycus sagulatus Gorham	primary
Keiper & Solomon 1972	Photuris pennsylvanica	primary
Kiichiro 1961	Luciola cruciata, Aquatica lateralis, Luciola parvula Kiesenwetter	Apud Sivinsli 1981
Kim, Kwon & Suh 2008	Aquatica lateralis	primary
King 1880	Pleotomus pallens LeConte	primary
Kok, Doorn & Dezfoulian 2019	cf Psilocladinae	primary
Kondo & Tanaka 1989	Aquatica lateralis	primary
Kondo & Yagi 2007	Luciola cruciata	primary
Korschefsky 1951	Lampyris, Phausis, Phosphaenus	Apud Novak (2017, 2018a,b)
Kumode, Tanaka & Yuma 1999	Luciola cruciata	primary
Kusui 1979	Lychnuris sp. (Pyrocoelia?)	primary
Kyuka et al. 2010	Luciona cruciata	primary
LaBella & Lloyd 1991	Bicellonycha	primary
Lanuza-Garay et al. 2020	Cratomorphus signativentris Olivier	primary
Lee & Boo 1991	Luciola lateralis	primary
Lee et al. 2003	Aquatica lateralis	primary
Lee et al. 2008	Aquatica lateralis	primary
Lehtonen et al. 2021	Lampyris noctiluca	primary
Lequet & Faucheux 2015	Lampyris noctiluca	Apud https://www.insectes-net.fr/lampyre/lampyr6.htm
Lequet & Faucheux 2016	Lampyris nocitula	Apud https://www.insectes-net.fr/lampyre/lampyr6.htm
Lewis et al. 2020	Lamprohizinae, Lampyrinae, Luciolinae, Photurinae	primary
Lheritier 1955	Pelania mauritanica	Apud Sivinski et al 1998
Li et al. 2008	Pyrocoelia pygidialis Pic	Abstract at https://www.airitilibrary.com/Publication/alDetailedMesh?docid=10007482-200812-30-4-300-308-a
Liew & Schilthuizen 2014	Pteroptyx cf. valida	primary
Lloyd 1973a	Photuris spp., Photinus spp., Pyractomena borealis, Lucidota atra, Pyropyga nigricans, Ellychnia corrusca	primary
Lloyd 1973b	Luciola	primary
Lloyd 1973c	Ellychnia corrusca, Pyractomena, Photuris, Photinus	Apud Sivinski 1981, Buschman 2019
Lloyd 2006	Pyractomena borealis	Apud Owens & Lewis 2018
Lloyd 2018	Photurinae, Lampyrinae	primary
Lloyd, Wing & Hongtrakul 1989	Pterotyx	primary
Loomboot et al. 2007	Pteroptyx malaccae	primary
Lucas 1904	Lamprigera sp.	primary
Maas et al 2001	Lampyris noctiluca	primary
Madruga & Branham 2020	Alecton discoidalis Laporte	primary
Madruga 2018	Alecton discoidallis	primary
Madruga-R. & Hernández-Q. 2010	Alecton discoidallis	primary
Majka & MacIvor 2009	Phosphaenus hemipterus (Goeze)	primary
Margry 2013	Lampyris noctiluca	Abstract at Zoological Records.
Matsuda et al. 2010	Luciola parvula	primary
Mbugua, Wong & Ratnayeke 2020	Lamprigera sp.	primary
McDermott 1954	Micronaspis floridana Green	primary
McDermott 1960	Pyractomena	primary
McLean, Buch & Hanson 1972	Photuris spp.	primary
Mehta 1932	Abscondita chinensis	Apud Fu, Ballantyne & Lambkin 2012
Mei et al. 2020	Emeia pseudosauteri	Abstract at http://hjkcxb.alljournals.net/ch/reader/view_abstract.aspx?file_no=202002009&flag=1
Meinert 1886	Lampyris	primary
Minami 1966	Luciola cruciata, L. owadai	Apud Fu, Ballantyne and Lambkin 2012
Mobilim & Dawood 2020	Pyrocoelia sp., and others indet.	primary
Moriya, Yamagauchi & Nakagoshi 2009b	Luciola cruciata	primary
Moriya, Yamauchi & Nakagoshi 2006	Luciola cruciata	primary
Moriya, Yamauchi & Nakagoshi 2007	Luciola cruciata	Apud Moriya, Yamauchi & Nakagoshi 2009
Moriya, Yamauchi & Nakagoshi 2009a	Luciola cruciata	primary
Murphy & Moiseff 2019	Photuris	primary
Murphy & Moiseff 2020	Photuris	primary
Nada, Ballantyne & Jusoh 2021	Pygoluciola dunguna Nada	primary
Naisse 1969	Lampyris noctiluca	primary
Nakane & Ohba 1981	Luciola	Apud Fu et al. 2006b
Nathanson & Hunnicutt 1979	Photuris sp.	primary
Natsumeda, Matsuda & Yuma 2013	Luciola cruciata, Aquatica lateralis	primary
Newport 1857	Lampyris nocticula	primary
Nishijima, Yasuoka & Maeto 2010	Luciola parvula	primary
Noh et al. 1990	Aquatica lateralis	abstract at https://www.cabdirect.org/cabdirect/abstract/19920502421
Novák 2017	Lampyris noctiluca	primary
Novák 2018a	Lamprohiza splendidula	primary
Novák 2018b	Phosphaenus hemipterus	primary
Nunes et al. 2021	Aspisoma sticticum Gemminger	primary
O'Donald 1968	Lampyris	primary
Oba et al. 2006	Luciola cruciata	primary
Oba et al. 2010	Luciola cruciata	primary
Oba, Oba & Konishi 2012	Luciola parvula	primary
Oertel & Case 1976	Photuris sp	primary
Oertel, Linberg & Case 1975	Photuris sp	primary
Oh, Kang & Nam 2009a	Aquatica lateralis	primary
Oh, Kang & Nam 2009b	Aquatica lateralis	primary
Ohba & Goto 1989	Luciola yayeyamana Matsumura	Abstract at Zoological Record
Ohba & Goto 1991	Pristolycus sagulatus	Apud Fu & Ballantyne 2008
Ohba & Sim 1994	Pteroptyx valida	Apud Wang et al. 2007
Ohba 1983	Drlaster, Stenocladius, Lucidina biplagiata (Motschulsky)	Apud Janisova & Bocakova 2013
Ohba 1986	Aquatica lateralis	Apud Fu, Ballantyne & Lambkin 2012
Ohba 1988a	Luciola cruciata	Apud Ho et al. 2010
Ohba 1988b	Luciola	Apud Fu et al. 2005a
Ohba 1991	Luciola	Apud Fu et al. 2006b
Ohba 1997	Luciola	Apud Fu et al. 2006b
Ohba 2005	Pyrocoelia abdominalis Nakane, P. atripennis	primary
Ohba 2007	Pyrocoelia fumosa (Gorham)	Abstract at Zoological Records
Ohba et al. 1994	Luciola owadai	primary
Ohba, Goto & Kawashima 1995	Pyrocoelia	primary
Ohba, Goto & Kawashima 1996	Stenocladius	primary
Ohtsuki et al 2014	Luciola cruciata	primary
Okada 1928	Luciola cruciata, Aquatica lateralis	primary
Owens & Lewis 2021	Photuris sp.	primary
Owsjannikow 1864	Lampyris noctiluca	primary
Paiva 1919	Lamprigera tenebrosa	primary
Panigrahi 2000	Lampyris	listed at FIN
Peterson 1957	Lamprigera tenebrosa	primary
Peterson 1970	Photuris versicolor, Photuris lucicrescens	primary
Planet 1908	Lampyris noctilula	primary
Pototskaja 1983	Lampyris noctiluca	primary
Qin & Fu 2009	Diaphanes sp., Pyrocoelia pectoralis	abstract at http://113.31.20.151/articles/article_detail.aspx?id=29390807
Raj 1941	Lamprigera	Apud Ballantyne & Menayah 2002
Raj 1943a	Diaphanes sp	primary
Raj 1943b	Lamprigera tenebrosa	primary
Raj 1943c	Lamprigera tenebrosa	primary
Raj 1947	Luciola trivandrensis, Luciola indica (Motschulsky)	primary
Raj 1952	Luciolinae	primary
Rey 1882	Lamprohiza mulsanti	primary
Robinson 2009	Indet	primary
Rosa 2007	Photuris femoralis	primary
Sato 2019	Pyrocoelia atripennis	primary
Saxton et al. 2019	Atyphella	primary
Schaller & Schwalb 1961	Lampyrinae	Listed at Zoological records
Schaller 2001	Lampyrinae	listed at FIN
Schwalb 1961	Lampyris noctiluca, Lamprohriza splendilula	primary
Sekine et al. 2007	Luciola cruciata	primary
Sivinski 1981	Pyractomena lucifera, P. barberi Green, P. limbicollis, Micronaspis floridana, Pterotus obscuripennis Photinus sp.	primary
Sivinski et al. 1998	Pleotomodes needhami Green	primary
Smedley et al. 2017	Ellychnia corrusca	primary
Sodeman, Rodrick & Vincent 1980	unspecified	primary
Stansbury & Moczek 2014	Photuris	primary
Strause & Case 1981	Photuris pennsylvanica	primary
Strause & DeLuca 1981	Photuris pennsylvanica	primary
Strause, DeLuca & Case 1979	Photuris pennsylvanica	primary
Tabaru et al. 1970	Luciola cruciata	primary
Takeda et al. 2006	Luciola cruciata	primary
Thancharoen et al. 2007	Luciola aquatilis	primary
Tisi et al. 2014	Lampyris noctiluca	primary
Tonolli et al. 2011	Aspisoma lineatum	primary
Tozzetti 1866	Luciola italica	primary
Tozzetti 1870	Luciola italica	primary
Trice & Tyler 2007	Lampyris noctiluca	primary
Trice, Tyler & Day 2004	Lampyris noctiluca L., Luciola cruciata, Nyctophila sp	primary
Tyler & Trice 2001	Lampyris noctiluca	primary
Tyler 1997a	Lampyris noctiluca	primary
Tyler 1997b	Lampyris noctiluca	primary
Tyler 2001a	Lampyris noctiluca	primary
Tyler 2001b	Lampyris noctiluca	primary
Tyler 2002	Lampyris noctiluca	Apud Alvarez & DeCock 2011
Tyler et al. 2008	Lampyris noctiluca	primary
Underwood, Tallomy & Pesek 1997	Photuris sp.	primary
Vaz et al. 2021	Micronaspis gabrielae Vaz, Rocha & Silveira	primary
Vaz, Silveira & Rosa 2020	Psilocladus costae Vaz, Silveira e Rosa	primary
Vencl et al. 2012	Photuris	Apud Vencl et al. 2016
Verhoeff 1924	Lamprohiza splendilula	primary
Viviani & Bechara 1995	Cratomorphus concolor (Perty), Aspisoma sp., A. lineatum	primary
Viviani 2001	Cratomorphus concolor, Cratomorphus spp, Aspisoma lineatum, Bicellonycha lividipennis Motschulsky, Bicellonycha ornaticollis (Blanchard), Pyrogaster sp	primary
Viviani et al. 2004	Cratomorphus distinctus Olivier	primary
Viviani et al. 2008	Aspisoma lineatum, Cratomorphus sp	primary
Viviani, Rosa & Martins 2012	Aspisoma lineatum	primary
Vogel 1912	Lampyris nocticula	primary
Vogel 1915	Lampyris nocticula	primary
Vogel 1922	Lamprohriza splendilula	primary
Vongsangnak, Chumnanpuen & Sriboonlert 2016	Sclerotia aquatilis	primary
Wang et al 2007	Pyrocoelia pectoralis	primary
Wenzel 1896	Pyractomena ecostata (LeConte)	primary
Wickham 1895	Lucidota	primary
Wielowiejski 1882	Lampyris noctiluca, Lamprohiza splendilula	primary
Wienhausen & DeLuca 1985	Photuris sp	primary
Wijekoon, Wegiriya & Bogahawatta 2016	Lamprigera tenebrosa	primary
Wilcox & Lewis 2019	Ellychnia corrusca	primary
Williams 1914	Photuris pennsylvanica	primary
Williams 1917a	Photuris pennsylvanica, Photinus consanguineus	primary
Williams 1917b	Photuris pennsylvanica, Photinus consanguineus	primary
Wooton 1976	Lampyris nocticula	primary
Wu & Perng 2007	Pyrocoelia analis	primary
Wu & Yang 2008	Pyrocoelia praetexta, Diaphanes citrinus (E.Olivier), Luciola cerata, L. praeusta Kiesenwetter	primary
Wu et al. 2012	Pyrocoelia, Diaphanes	primary
Wunsch 1995	Lampyris nocticula	primary
Wynberg et al. 1980	Photuris lucicrescens, Photuris versicolor	primary
Xian et al. 2011	Lamprigera yunnana	abstract at https://en.cnki.com.cn/Article_en/CJFDTotal-HXZI201101007.htm
Yajima 2015	Luciola cruciata, Luciola lateralis	primary
Yajuma 2007	Luciola cruciata	primary
Yang et al. 2020	Aquatica leii	primary
Yeh 1999	Aquatica ficta	Apud Ho et al. 2010
Yiu 2011	Stenocladius sp., Lamprigera sp., Pyrocoelia sp., Pteroptyx sp.	primary
Yoshida et al. 2020	Diaphanes lampyroides	primary
Yuan et al. 2007	Sclerotia substriata	primary
Yuma 1981	Luciola cruciata	primary
Yuma 1982	Luciola cruciata	primary
Yuma 1984	Luciola cruciata	primary
Yuma 1986	Luciola cruciata	Apud Iguchi 2001
Yuma 2007	Luciola cruciata	primary
Zaragoza-Caballero et al. 2020	Photinus spp	primary
Zhang et al. 2019	Aquatica leii	primary
Zhang et al. 2020	Aqualica leii	primary
Zhang et al. 2021	Aquatica wuhana	primary
Zheng et al. 2008	Luciola leii	Abstract at Zoological Record
Zheng et al. 2008a	Aquatica leii	abstract at https://en.cnki.com.cn/Article_en/CJFDTotal-KCZS200803028.htm
Zheng et al. 2008b	Sclerotia substriata	primary
